# Supplementary material for: Increased Risk of Hospitalization for Pneumonia in Italian Adults from 2010 to 2019: Scientific Evidence for a Call to Action
Source: MDPI journal article supplement (doi:10.3390/vaccines11010187), 2023-01-16
Supplement: s1 [file s1]

Table S1. ICD 9 CM codes used to identify hospitalizations for pneumonia.

- 480.0 Adenovirus pneumonia
- 480.1 Respiratory syncytial virus pneumonia
- 480.2 Parainfluenza virus pneumonia
- 480.3 SARS-associated Coronavirus pneumonia
- 480.8 Pneumonia due to other viruses, not elsewhere classified
- 480.9 Viral pneumonia, unspecified
- 481 Pneumococcal pneumonia (Streptococcal pneumoniae pneumonia)
- 482.0 Klebsiella pneumoniae pneumonia
- 482.1 Pseudomonas pneumonia
- 482.2 Hemophilus influenzae pneumonia (H. influenzae)
- 482.30 Streptococcal pneumonia, unspecified
- 482.31 Streptococcal pneumonia, group A
- 482.32 Streptococcal pneumonia, group B
- 482.39 Pneumonia due to other Streptococci
- 482.40 Staphylococcal pneumonia, unspecified
- 482.41 Staphylococcal aureus pneumonia
- 482.81 Pneumonia due to anaerobes
- 482.82 Escherichia coli pneumonia [E. coli]
- 482.83 Pneumonia due to other gram-negative bacteria
- 482.89 Pneumonia due to other specified bacteria
- 482.9 Bacterial pneumonia, unspecified
- 483.0 Mycoplasma Pneumoniae pneumonia
- 483.1 Chlamydial pneumonia
- 483.8 Pneumonia due to other specified organisms
- 484.1 Cytomegalovirus pneumonia
- 484.3 Pneumonia in whooping cough
- 484.6 Pneumonia in aspergillosis
- 484.7 Pneumonia in other systemic mycoses
- 484.8 Pneumonia in other infectious diseases classified elsewhere
- 485 Bronchopneumonia, unspecified agent
- 486 Pneumonia, unspecified agent
- 487.0 Influenza with pneumonia

Table S2. ICD 9 CM codes used to identify the different possible underlying comorbidities observed in each hospitalization

| ICD 9 CM codes | Diagnosis                       | Etiologic class           |
|----------------|---------------------------------|---------------------------|
| 480.0          | Adenovirus pneumonia            | Specified Pneumonia viral |
| 480.1          | Respiratory syncytial virus     | Specified Pneumonia viral |
| 480.2          | Parainfluenza virus pneumonia   | Specified Pneumonia viral |
| 480.3          | SARS-associated Coronavirus     | Specified Pneumonia viral |
| 480.8          | Pneumonia due to other viruses, | Unspecified Pneumonia     |
| 480.9          | Viral pneumonia, unspecified    | Unspecified Pneumonia     |
| 481            | Pneumococcal pneumonia          | Specified Pneumonia       |
| 482.0          | Klebsiella pneumoniae           | Specified Pneumonia       |
| 482.1          | Pseudomonas pneumonia           | Specified Pneumonia       |
| 482.2          | Hemophilus influenzae           | Specified Pneumonia       |
| 482.30         | Streptococcal pneumonia,        | Specified Pneumonia       |
| 482.31         | Streptococcal pneumonia, group  | Specified Pneumonia       |
| 482.32         | Streptococcal pneumonia, group  | Specified Pneumonia       |
| 482.39         | Pneumonia due to other          | Specified Pneumonia       |
| 482.40         | Staphylococcal pneumonia,       | Specified Pneumonia       |
| 482.41         | Staphylococcal aureus           | Specified Pneumonia       |
| 482.8          | Pneumonia due to anaerobes      | Specified Pneumonia       |
| 482.82         | Escherichia coli pneumonia [E.  | Specified Pneumonia       |
| 482.83         | Pneumonia due to other gram-    | Unspecified Pneumonia     |
| 482.89         | Pneumonia due to other          | Specified Pneumonia       |
| 482.9          | Bacterial pneumonia,            | Unspecified Pneumonia     |
| 483.0          | Mycoplasma Pneumoniae           | Specified Pneumonia       |
| 483.1          | Chlamydial pneumonia            | Specified Pneumonia       |
| 483.8          | Pneumonia due to other          | Others                    |
| 484.1          | Cytomegalovirus pneumonia       | Specified Pneumonia viral |
| 484.3          | Pneumonia in whooping cough     | Specified Pneumonia       |
| 484.6          | Pneumonia in aspergillosis      | Specified Pneumonia fungi |
| 484.7          | Pneumonia in other systemic     | Unspecified Pneumonia     |
| 484.8          | Pneumonia in other infectious   | Unspecified Pneumonia     |
| 485            | Bronchopneumonia, unspecified   | Unspecified Pneumonia     |
| 486            | Pneumonia, unspecified agent    | Unspecified Pneumonia     |
| 487.0          | Influenza with pneumonia        | Specified Pneumonia viral |

Table S3. ICD 9 CM codes used to identify the different possible causes of pneumonia.

| ICD9-CM | Description                                                             | Comorbidities                |
|---------|-------------------------------------------------------------------------|------------------------------|
| 416.9   | Chronic cardiopulmonary disease, unspecified                            | Chronic respiratory diseases |
| 491.0   | Simple chronic bronchitis                                               | Chronic respiratory diseases |
| 491.1   | Chronic mucopurulent bronchitis                                         | Chronic respiratory diseases |
| 491.20  | Chronic obstructive bronchitis, without exacerbation                    | Chronic respiratory diseases |
| 491.21  | Chronic obstructive bronchitis, with exacerbation (acute)               | Chronic respiratory diseases |
| 491.22  | Chronic obstructive bronchitis with acute bronchitis                    | Chronic respiratory diseases |
| 491.8   | Other chronic bronchitis                                                | Chronic respiratory diseases |
| 491.9   | Unspecified chronic bronchitis                                          | Chronic respiratory diseases |
| 493.20  | Chronic obstructive asthma                                              | Chronic respiratory diseases |
| 493.22  | Chronic obstructive asthma with flare-up                                | Chronic respiratory diseases |
| 518.83  | Chronic respiratory failure                                             | Chronic respiratory diseases |
| 518.84  | Acute and chronic respiratory failure                                   | Chronic respiratory diseases |
| 414.8   | Other specified forms of chronic ischemic heart disease                 | Chronic heart diseases       |
| 414.9   | Unspecified chronic ischemic heart disease                              | Chronic heart diseases       |
| 428.22  | Chronic systolic heart failure                                          | Chronic heart diseases       |
| 428.23  | Acute and chronic systolic heart failure                                | Chronic heart diseases       |
| 428.32  | Chronic diastolic heart failure                                         | Chronic heart diseases       |
| 428.33  | Acute and chronic diastolic heart failure                               | Chronic heart diseases       |
| 428.42  | Chronic combined systolic and diastolic heart failure                   | Chronic heart diseases       |
| 428.43  | Acute and chronic combined systolic and diastolic heart failure         | Chronic heart diseases       |
| 404.11  | Benign hypertensive cardiomegaly with heart failure and chronic         | Chronic kidney diseases      |
| 585.1   | Chronic kidney disease, stage I                                         | Chronic kidney diseases      |
| 585.2   | Chronic kidney disease, stage II (mild)                                 | Chronic kidney diseases      |
| 585.3   | Chronic kidney disease, stage III (moderate)                            | Chronic kidney diseases      |
| 585.4   | Chronic kidney disease, stage IV (severe)                               | Chronic kidney diseases      |
| 585.5   | Stage V chronic kidney disease                                          | Chronic kidney diseases      |
| 585.6   | Chronic kidney disease, final stage                                     | Chronic kidney diseases      |
| 585.9   | Chronic kidney disease, unspecified                                     | Chronic kidney diseases      |
| 250.00  | Diabetes mellitus, type II or unspecified, undefined if decompensated,  | Diabetes                     |
| 250.01  | Diabetes mellitus, type I (juvenile diabetes), undefined if             | Diabetes                     |
| 250.02  | Diabetes mellitus, type II or unspecified, decompensated, without       | Diabetes                     |
| 250.03  | Diabetes mellitus, type I (juvenile diabetes), decompensated            | Diabetes                     |
| 250.10  | Diabetes with ketoacidosis, type II or unspecified, undefined if offset | Diabetes                     |
| 250.11  | Diabetes with ketoacidosis, type I (juvenile diabetes), not defined if  | Diabetes                     |
| 250.12  | Diabetes with ketoacidosis, type II or unspecified, decompensated       | Diabetes                     |
| 250.13  | Diabetes with ketoacidosis, type I (juvenile diabetes), decompensated   | Diabetes                     |
| 250.20  | Diabetes with hyperosmolarity, type II or unspecified, undefined if     | Diabetes                     |
| 250.21  | Diabetes with hyperosmolarity type I (juvenile diabetes), undefined if  | Diabetes                     |
| 250.22  | Diabetes with hyperosmolarity, type II or unspecified, decompensated    | Diabetes                     |
| 250.30  | Diabetes with other types of coma, type II or unspecified, undefined if | Diabetes                     |
| 250.32  | Diabetes with other types of coma, type II or unspecified,              | Diabetes                     |
| 250.40  | Type II or unspecified diabetes, undefined if decompensated, with       | Diabetes                     |
| 250.41  | Type I diabetes (juvenile diabetes), undefined if decompensated, with   | Diabetes                     |
| 250.42  | Type II or unspecified diabetes, decompensated, with renal              | Diabetes                     |
| 250.43  | Type I diabetes (juvenile diabetes), decompensated, with renal          | Diabetes                     |
| 250.50  | Type II or unspecified diabetes, undefined if controlled, with ocular   | Diabetes                     |
| 250.51  | Type I diabetes (juvenile diabetes), undefined when controlled, with    | Diabetes                     |
| 250.52  | Type II or unspecified diabetes, decompensated, with eye                | Diabetes                     |
| 250.60  | Type II or unspecified diabetes, undefined if decompensated, with       | Diabetes                     |
| 250.61  | Type I diabetes (juvenile diabetes), undefined if decompensated, with   | Diabetes                     |
| 250.62  | Type II or unspecified diabetes, decompensated, with neurological       | Diabetes                     |
| 250.63  | Type I diabetes (juvenile diabetes), decompensated, with neurological   | Diabetes                     |
| 250.70  | Type II or unspecified diabetes, undefined if decompensated, with       | Diabetes                     |

|        |                                                                         |          |
|--------|-------------------------------------------------------------------------|----------|
| 250.71 | Type I diabetes (juvenile diabetes), undefined if decompensated, with   | Diabetes |
| 250.72 | Type II or unspecified diabetes, decompensated, with peripheral         | Diabetes |
| 250.73 | Type I diabetes (juvenile diabetes), decompensated, with peripheral     | Diabetes |
| 250.80 | Type II or unspecified diabetes, undefined if decompensated, with       | Diabetes |
| 250.82 | Type II or unspecified diabetes, decompensated, with other specified    | Diabetes |
| 250.90 | Type II or unspecified diabetes, undefined if decompensated, with       | Diabetes |
| 250.91 | Type I diabetes (juvenile diabetes), undefined if decompensated, with   | Diabetes |
| 250.92 | Type II or unspecified diabetes, decompensated, with complications      | Diabetes |
| 253.5  | Diabetes insipidus                                                      | Diabetes |
| 357.2  | Polyneuropathy in diabetes                                              | Diabetes |
| 366.41 | Diabetic cataract                                                       | Diabetes |
| 588.1  | Nephrogenic diabetes insipidus                                          | Diabetes |
| 648.00 | Diabetes mellitus, unspecified episode of cure                          | Diabetes |
| 775.1  | Neonatal diabetes mellitus                                              | Diabetes |
| V18.0  | Family history of diabetes mellitus                                     | Diabetes |
| 140.   | Malignant tumors of the lips                                            | Cancer   |
| 140.0  | Malignant tumors of the upper lip, rosy border                          | Cancer   |
| 140.1  | Malignant tumors of the lower lip, rosy border                          | Cancer   |
| 140.3  | Malignant tumors of the upper lip, inner surface                        | Cancer   |
| 140.4  | Malignant tumors of the lower lip, inner surface                        | Cancer   |
| 140.5  | Malignant tumors of the unspecified lip, inner surface                  | Cancer   |
| 140.6  | Malignant tumors of the commissure of the lips                          | Cancer   |
| 140.8  | Malignant tumors of other sites of the lips                             | Cancer   |
| 140.9  | Malignant lip tumors not specified, rosy border                         | Cancer   |
| 141.   | Malignant tumors of the tongue                                          | Cancer   |
| 141.0  | Malignant tumors of the base of the tongue                              | Cancer   |
| 141.1  | Malignant tumors of the dorsal surface of the tongue                    | Cancer   |
| 141.2  | Malignant tumors of the tip and lateral margins of the tongue           | Cancer   |
| 141.3  | Malignant tumors of the ventral surface of the tongue                   | Cancer   |
| 141.4  | Malignancies of the anterior two-thirds of the tongue, part unspecified | Cancer   |
| 141.5  | Malignant tumors of the junctional zone                                 | Cancer   |
| 141.6  | Malignant tumors of the lingual tonsil                                  | Cancer   |
| 141.8  | Malignancies of other sites of the tongue                               | Cancer   |
| 141.9  | Malignant tumors of the tongue, site not specified                      | Cancer   |
| 142.   | Malignant tumors of the major salivary glands                           | Cancer   |
| 142.0  | Malignant tumors of the parotid gland                                   | Cancer   |
| 142.1  | Malignant tumors of the submandibular gland                             | Cancer   |
| 142.2  | Malignant tumors of the sublingual gland                                | Cancer   |
| 142.8  | Malignant tumors of other major salivary glands                         | Cancer   |
| 142.9  | Malignant tumors of the salivary gland, unspecified                     | Cancer   |
| 143.   | Malignant tumors of the gums                                            | Cancer   |
| 143.0  | Malignant tumors of the upper gum                                       | Cancer   |
| 143.1  | Malignant tumors of the lower gum                                       | Cancer   |
| 143.8  | Malignant tumors of other sites of the gum                              | Cancer   |
| 143.9  | Malignant tumors of the gum, unspecified                                | Cancer   |
| 144.   | Malignant tumors of the floor of the mouth                              | Cancer   |
| 144.0  | Malignant tumors of the front of the mouth                              | Cancer   |
| 144.1  | Malignant tumors of the lateral part of the mouth                       | Cancer   |
| 144.8  | Malignant tumors of other sites of the floor of the mouth               | Cancer   |
| 144.9  | Malignant tumors of the floor of the mouth, part not specified          | Cancer   |
| 145.   | Malignant tumors of other and unspecified parts of the mouth            | Cancer   |
| 145.0  | Malignant tumors of the mucous membrane of the cheeks                   | Cancer   |
| 145.1  | Malignant tumors of the vestibule of the mouth                          | Cancer   |
| 145.2  | Malignant tumors of the hard palate                                     | Cancer   |
| 145.3  | Malignant tumors of the soft palate                                     | Cancer   |
| 145.4  | Malignant tumors of the uvula                                           | Cancer   |
| 145.5  | Malignant tumors of the palate, unspecified                             | Cancer   |
| 145.6  | Malignant tumors of the retromolar area                                 | Cancer   |
| 145.8  | Malignant tumors of other (specified) parts of the mouth                | Cancer   |
| 145.9  | Malignant tumors of the mouth, unspecified                              | Cancer   |

|       |                                                                            |        |
|-------|----------------------------------------------------------------------------|--------|
| 146.  | Malignant tumors of the oropharynx                                         | Cancer |
| 146.0 | Malignant tumors of the tonsil                                             | Cancer |
| 146.1 | Malignant tumors of the tonsillar fossa                                    | Cancer |
| 146.2 | Malignant tumors of the tonsillar pillars (anterior) (posterior)           | Cancer |
| 146.3 | Malignant tumors of vallecula                                              | Cancer |
| 146.4 | Malignant tumors of the anterior face of the epiglottis                    | Cancer |
| 146.5 | Malignant tumors of the junctional region                                  | Cancer |
| 146.6 | Malignant tumors of the lateral wall of the oropharynx                     | Cancer |
| 146.7 | Malignant tumors of the posterior wall of the oropharynx                   | Cancer |
| 146.8 | Malignancies of other (specified) sites of the oropharynx                  | Cancer |
| 146.9 | Malignant tumors of the oropharynx, unspecified                            | Cancer |
| 147.  | Malignant tumors of the nasopharynx                                        | Cancer |
| 147.0 | Malignant tumors of the upper wall of the nasopharynx                      | Cancer |
| 147.1 | Malignant tumors of the posterior wall of the nasopharynx                  | Cancer |
| 147.2 | Malignant tumors of the lateral wall of the nasopharynx                    | Cancer |
| 147.3 | Malignant tumors of the anterior wall of the nasopharynx                   | Cancer |
| 147.8 | Malignancies of other specified sites of the nasopharynx                   | Cancer |
| 147.9 | Malignant tumors of the nasopharynx, unspecified                           | Cancer |
| 148.  | Malignant tumors of the hypopharynx                                        | Cancer |
| 148.0 | Malignant tumors of the retrocricoid region                                | Cancer |
| 148.1 | Malignant tumors of the piriformis sinus                                   | Cancer |
| 148.2 | Malignant tumors of the hypopharyngeal face of the ariepigloptic fold      | Cancer |
| 148.3 | Malignant tumors of the posterior hypopharyngeal wall                      | Cancer |
| 148.8 | Malignancies of other (specified) sites of the hypopharynx                 | Cancer |
| 148.9 | Malignant tumors of the hypopharynx, unspecified                           | Cancer |
| 149.  | Malignant tumors of other and ill-defined sites of the lips, oral cavity   | Cancer |
| 149.0 | Malignant tumors of the pharynx, unspecified                               | Cancer |
| 149.1 | Malignant tumors of Waldeyer's ring                                        | Cancer |
| 149.8 | Other malignant tumors of other and ill-defined sites of the lips, oral    | Cancer |
| 149.9 | Malignant tumors of ill-defined sites of the lips, oral cavity and pharynx | Cancer |
| 150.  | Malignant tumors of the esophagus                                          | Cancer |
| 150.0 | Malignant tumors of the cervical esophagus                                 | Cancer |
| 150.1 | Malignant tumors of the thoracic esophagus                                 | Cancer |
| 150.2 | Malignant tumors of the abdominal esophagus                                | Cancer |
| 150.3 | Malignant tumors of the upper third of the esophagus                       | Cancer |
| 150.4 | Malignant tumors of the middle third of the esophagus                      | Cancer |
| 150.5 | Malignant tumors of the lower third of the esophagus                       | Cancer |
| 150.8 | Malignant tumors of another specified part of the esophagus                | Cancer |
| 150.9 | Malignant tumors of the esophagus, unspecified                             | Cancer |
| 151.  | Malignant tumors of the stomach                                            | Cancer |
| 151.0 | Malignant tumors of the cardia                                             | Cancer |
| 151.1 | Malignant pylorus tumors                                                   | Cancer |
| 151.2 | Malignant tumors of the pyloric antrum                                     | Cancer |
| 151.3 | Malignant tumors of the bottom of the stomach                              | Cancer |
| 151.4 | Malignant tumors of the body of the stomach                                | Cancer |
| 151.5 | Malignant tumors of small curvature, unspecified                           | Cancer |
| 151.6 | Malignant tumors of the large curvature, unspecified                       | Cancer |
| 151.8 | Malignant tumors of other (specified) sites of the stomach                 | Cancer |
| 151.9 | Malignant tumors of the stomach, unspecified                               | Cancer |
| 152.  | Malignant tumors of the small intestine, including the duodenum            | Cancer |
| 152.0 | Malignant tumors of the duodenum                                           | Cancer |
| 152.1 | Malignant tumors of fasting                                                | Cancer |
| 152.2 | Malignant tumors of the ileum                                              | Cancer |
| 152.3 | Malignant tumors of Meckel's diverticulum                                  | Cancer |
| 152.8 | Malignancies of other (specified) sites of the small intestine             | Cancer |
| 152.9 | Malignant tumors of the small intestine, unspecified                       | Cancer |
| 153.  | Malignant tumors of the colon                                              | Cancer |
| 153.0 | Malignant tumors of the hepatic flexure                                    | Cancer |
| 153.1 | Malignant tumors of the transverse colon                                   | Cancer |
| 153.2 | Malignant tumors of the descending colon                                   | Cancer |

|       |                                                                         |        |
|-------|-------------------------------------------------------------------------|--------|
| 153.3 | Malignant tumors of the sigmoid                                         | Cancer |
| 153.4 | Malignant tumors of the Czech                                           | Cancer |
| 153.5 | Malignant tumors of the appendix                                        | Cancer |
| 153.6 | Malignant tumors of the ascending colon                                 | Cancer |
| 153.7 | Malignant tumors of splenic flexure                                     | Cancer |
| 153.8 | Malignancies of other (specified) sites of the large intestine          | Cancer |
| 153.9 | Malignant tumors of the colon, unspecified                              | Cancer |
| 154.  | Malignant tumors of the rectum, rectosigmoid junction and anus          | Cancer |
| 154.0 | Malignant tumors of the rectosigmoid junction                           | Cancer |
| 154.1 | Malignant tumors of the rectum                                          | Cancer |
| 154.2 | Malignant tumors of the canal                                           | Cancer |
| 154.3 | Malignant tumors of the anus, unspecified                               | Cancer |
| 154.8 | Other malignant tumors of the rectum, rectosigmoid junction and anus    | Cancer |
| 155.  | Malignant tumors of the liver and intrahepatic bile ducts               | Cancer |
| 155.0 | Primary malignant tumors of the liver                                   | Cancer |
| 155.1 | Malignant tumors of the intrahepatic bile ducts                         | Cancer |
| 155.2 | Malignant tumors of the liver, unspecified whether primary or           | Cancer |
| 156.  | Malignant tumors of the gallbladder and extrahepatic bile ducts         | Cancer |
| 156.0 | Malignant tumors of the gallbladder                                     | Cancer |
| 156.1 | Malignant tumors of the extrahepatic bile ducts                         | Cancer |
| 156.2 | Malignant tumors of the ampulla of Vater                                | Cancer |
| 156.8 | Malignancies of other (specified) sites of the gallbladder and          | Cancer |
| 156.9 | Malignant tumors of the biliary tract, unspecified                      | Cancer |
| 157.  | Malignant tumors of the pancreas                                        | Cancer |
| 157.0 | Malignant tumors of the head of the pancreas                            | Cancer |
| 157.1 | Malignant tumors of the body of the pancreas                            | Cancer |
| 157.2 | Malignant tumors of the tail of the pancreas                            | Cancer |
| 157.3 | Malignant tumors of the pancreatic duct                                 | Cancer |
| 157.4 | Malignant tumors of the islets of Langerhans                            | Cancer |
| 157.8 | Malignant tumors of other (specified) sites of the pancreas             | Cancer |
| 157.9 | Malignant tumors of the pancreas, unspecified part                      | Cancer |
| 158.  | Malignant tumors of the retroperitoneum and peritoneum                  | Cancer |
| 158.0 | Malignant tumors of the retroperitoneum                                 | Cancer |
| 158.8 | Malignant tumors of specified parts of the peritoneum                   | Cancer |
| 158.9 | Malignant tumors of the peritoneum, unspecified                         | Cancer |
| 159.  | Malignant tumors of other and ill-defined sites of the digestive system | Cancer |
| 159.0 | Malignant tumors of the intestinal tract, part not specified            | Cancer |
| 159.1 | Malignant tumors of the spleen, not elsewhere classified                | Cancer |
| 159.8 | Malignant tumors of other sites of the digestive system and             | Cancer |
| 159.9 | Malignant tumors of poorly defined sites of the digestive system and    | Cancer |
| 160.  | Malignant tumors of the nasal cavities, middle ear and paranasal        | Cancer |
| 160.0 | Malignant tumors of the nasal cavities                                  | Cancer |
| 160.1 | Malignant tumors of the auditory tube, middle ear and mastoid cells     | Cancer |
| 160.2 | Malignant tumors of the maxillary sinus                                 | Cancer |
| 160.3 | Malignant tumors of the ethmoid sinus                                   | Cancer |
| 160.4 | Malignant tumors of the frontal sinus                                   | Cancer |
| 160.5 | Malignant tumors of the sphenoid sinus                                  | Cancer |
| 160.8 | Other malignancies of the nasal cavities, middle ear and paranasal      | Cancer |
| 160.9 | Malignant tumors of the paranasal sinuses, unspecified                  | Cancer |
| 161.  | Malignant tumors of the larynx                                          | Cancer |
| 161.0 | Malignant tumors of the glottis                                         | Cancer |
| 161.1 | Malignant tumors of the supraglottic region                             | Cancer |
| 161.2 | Malignant tumors of the subglottic region                               | Cancer |
| 161.3 | Malignant tumors of laryngeal cartilage                                 | Cancer |
| 161.8 | Malignancies of other specified sites of the larynx                     | Cancer |
| 161.9 | Malignant tumors of the larynx, unspecified                             | Cancer |
| 162.  | Malignant tumors of the trachea, bronchi and lungs                      | Cancer |
| 162.0 | Malignant tumors of the trachea                                         | Cancer |
| 162.2 | Malignant tumors of the main bronchus                                   | Cancer |
| 162.3 | Malignant tumors of the upper lobe, bronchus or lung                    | Cancer |

|       |                                                                           |        |
|-------|---------------------------------------------------------------------------|--------|
| 162.4 | Malignant tumors of the middle lobe, bronchus or lung                     | Cancer |
| 162.5 | Malignant tumors of the lower lobe, bronchus or lung                      | Cancer |
| 162.8 | Malignant tumors of other parts of the bronchi or lungs                   | Cancer |
| 162.9 | Malignant tumors of the bronchus or lung, unspecified                     | Cancer |
| 163.  | Malignant tumors of the pleura                                            | Cancer |
| 163.0 | Malignant tumors of the parietal pleura                                   | Cancer |
| 163.1 | Malignant tumors of the visceral pleura                                   | Cancer |
| 163.8 | Malignancies of other specified sites of the pleura                       | Cancer |
| 163.9 | Malignant tumors of the pleura, unspecified                               | Cancer |
| 164.  | Malignant tumors of the thymus, heart and mediastinum                     | Cancer |
| 164.0 | Malignant tumors of the thymus                                            | Cancer |
| 164.1 | Malignant tumors of the heart                                             | Cancer |
| 164.2 | Malignant tumors of the anterior mediastinum                              | Cancer |
| 164.3 | Malignant tumors of the posterior mediastinum                             | Cancer |
| 164.8 | Other malignant tumors of the thymus, heart and mediastinum               | Cancer |
| 164.9 | Malignant tumors of the mediastinum, unspecified                          | Cancer |
| 165.  | Malignant tumors of other and ill-defined sites of the respiratory system | Cancer |
| 165.0 | Malignant upper respiratory tract tumors, part not specified              | Cancer |
| 165.8 | Other malignancies of other and ill-defined sites of the respiratory      | Cancer |
| 165.9 | Malignant tumors of poorly defined sites of the respiratory system        | Cancer |
| 170.  | Malignant tumors of bone and articular cartilage                          | Cancer |
| 170.0 | Malignant tumors of the bones of the skull and face, excluding the jaw    | Cancer |
| 170.1 | Malignant tumors of the jaw                                               | Cancer |
| 170.2 | Malignant tumors of the spine, excluding the sacrum and coccyx            | Cancer |
| 170.3 | Malignant tumors of ribs, sternum and clavicle                            | Cancer |
| 170.4 | Malignant tumors of the scapula and long bones of the upper limb          | Cancer |
| 170.5 | Malignant tumors of the short bones of the upper limb                     | Cancer |
| 170.6 | Malignant tumors of the pelvis, sacrum and coccyx                         | Cancer |
| 170.7 | Malignant tumors of the long bones of the lower limb                      | Cancer |
| 170.8 | Malignant tumors of the short bones of the lower limb                     | Cancer |
| 170.9 | Malignant tumors of bone and articular cartilage, site unspecified        | Cancer |
| 171.  | Malignant tumors of connective tissue and other soft tissues              | Cancer |
| 171.0 | Malignant tumors of the head, face and neck                               | Cancer |
| 171.2 | Malignant tumors of the upper limb including the shoulder                 | Cancer |
| 171.3 | Malignant tumors of the lower limb, including the hip                     | Cancer |
| 171.4 | Malignant tumors of the chest                                             | Cancer |
| 171.5 | Malignant tumors of the abdomen                                           | Cancer |
| 171.6 | Malignant tumors of the pelvis                                            | Cancer |
| 171.7 | Malignant tumors of the trunk, unspecified                                | Cancer |
| 171.8 | Malignancies of other specified sites of connective tissue and other      | Cancer |
| 171.9 | Malignant tumors of connective tissue and other soft tissues, site        | Cancer |
| 172.  | Malignant melanoma of the skin                                            | Cancer |
| 172.0 | Malignant melanoma of the lips                                            | Cancer |
| 172.1 | Malignant melanoma of the eyelid, including the eyelid angle              | Cancer |
| 172.2 | Malignant melanoma of ear and external ear canal                          | Cancer |
| 172.3 | Malignant melanoma of other and unspecified parts of the face             | Cancer |
| 172.4 | Malignant melanoma of scalp and neck                                      | Cancer |
| 172.5 | Malignant melanoma of the trunk, except the scrotum                       | Cancer |
| 172.6 | Malignant melanoma of the upper limb, including the shoulder              | Cancer |
| 172.7 | Malignant melanoma of the lower limb, including hip                       | Cancer |
| 172.8 | Malignant melanoma of other specified sites of the skin                   | Cancer |
| 172.9 | Cutaneous melanoma, site unspecified                                      | Cancer |
| 173.  | Other malignancies of the skin                                            | Cancer |
| 173.0 | Other malignant tumors of the skin of the lips                            | Cancer |
| 173.1 | Other malignancies of the eyelid, including the eyelid angle              | Cancer |
| 173.2 | Other malignant tumors of the skin of the ear and external ear canal      | Cancer |
| 173.3 | Other malignant skin tumours of other and unspecified parts of the        | Cancer |
| 173.4 | Other malignant tumors of the scalp and neck                              | Cancer |
| 173.5 | Other malignant tumors of the skin of the trunk, except the scrotum       | Cancer |
| 173.6 | Other malignant tumors of the skin of the upper limb, including the       | Cancer |

|       |                                                                        |        |
|-------|------------------------------------------------------------------------|--------|
| 173.7 | Other malignancies of the skin of the lower limb, including the hip    | Cancer |
| 173.8 | Other malignancies from other specified sites of the skin              | Cancer |
| 173.9 | Other malignancies of the skin, site unspecified                       | Cancer |
| 174.  | Malignant tumors of the woman's breast                                 | Cancer |
| 174.0 | Malignant tumors of the nipple and areola of the woman's breast        | Cancer |
| 174.1 | Malignant tumors of the central part of the woman's breast             | Cancer |
| 174.2 | Malignant tumors of the suprao-internal quadrant of the woman's        | Cancer |
| 174.3 | Malignant tumors of the inferior-internal quadrant of the woman's      | Cancer |
| 174.4 | Malignant tumors of the supra-external quadrant of the woman's breast  | Cancer |
| 174.5 | Malignant tumors of the infero-external quadrant of the woman's breast | Cancer |
| 174.6 | Malignant tumors of axillary prolongation of the woman's breast        | Cancer |
| 174.8 | Malignancies of the other specified sites of the woman's breast        | Cancer |
| 174.9 | Malignant breast (female) tumors, unspecified                          | Cancer |
| 175.  | Malignant tumors of the human breast                                   | Cancer |
| 175.0 | Malignant tumors of the nipple and areola of the human breast          | Cancer |
| 175.9 | Malignancies of other and unspecified sites of the human breast        | Cancer |
| 176.  | Kaposi's sarcoma                                                       | Cancer |
| 176.0 | Kaposi's sarcoma of the skin                                           | Cancer |
| 176.1 | Kaposi's sarcoma of soft tissues                                       | Cancer |
| 176.2 | Kaposi's sarcoma of the palate                                         | Cancer |
| 176.3 | Kaposi's sarcoma of gastrointestinal sites                             | Cancer |
| 176.4 | Kaposi's sarcoma of the lung                                           | Cancer |
| 176.5 | Kaposi's sarcoma of the lymph nodes                                    | Cancer |
| 176.8 | Kaposi's sarcoma from other specified sites                            | Cancer |
| 176.9 | Kaposi's sarcoma not specified                                         | Cancer |
| 179.  | Malignant tumors of the uterus, unspecified part                       | Cancer |
| 180.  | Malignant tumors of the cervix (uterine cervix)                        | Cancer |
| 180.0 | Malignant tumors of the endocervix                                     | Cancer |
| 180.1 | Malignant tumors of the exocervix                                      | Cancer |
| 180.8 | Malignant tumors of other specified sites of the cervix                | Cancer |
| 180.9 | Malignant tumors of the uterine cervix, unspecified                    | Cancer |
| 181.  | Malignant tumors of the placenta                                       | Cancer |
| 182.  | Malignant tumors of the body of the uterus                             | Cancer |
| 182.0 | Malignant tumors of the body of the uterus, except the isthmus         | Cancer |
| 182.1 | Malignant tumors of the isthmus                                        | Cancer |
| 182.8 | Malignant tumors of other specified sites of the body of the uterus    | Cancer |
| 183.  | Malignant tumors of the ovary and other uterine appendages             | Cancer |
| 183.0 | Malignant tumors of the ovary                                          | Cancer |
| 183.2 | Malignant tumors of the fallopian tube                                 | Cancer |
| 183.3 | Malignant tumors of the wide ligament                                  | Cancer |
| 183.4 | Malignant tumors of the parametrium                                    | Cancer |
| 183.5 | Malignant tumors of the round ligament                                 | Cancer |
| 183.8 | Malignancies of other specified sites of uterine appendages            | Cancer |
| 183.9 | Malignant tumors of uterine annexes, unspecified                       | Cancer |
| 184.  | Malignant tumors of other and unspecified female genital organs        | Cancer |
| 184.0 | Malignant tumors of the vagina                                         | Cancer |
| 184.1 | Malignant tumors of the labia majora                                   | Cancer |
| 184.2 | Malignant tumors of the labia minora                                   | Cancer |
| 184.3 | Malignant tumors of the clitoris                                       | Cancer |
| 184.4 | Malignant tumors of the vulva, unspecified                             | Cancer |
| 184.8 | Malignancies of other specified locations of the female genital organs | Cancer |
| 184.9 | Malignancies of the female genital organs, site unspecified            | Cancer |
| 185.  | Malignant tumors of the prostate                                       | Cancer |
| 186.  | Malignant tumors of the testicle                                       | Cancer |
| 186.0 | Malignant tumors of the testicle believed to be                        | Cancer |
| 186.9 | Malignant tumors of the testicle: other and unspecified                | Cancer |
| 187.  | Malignant tumors of the penis and other male genital organs            | Cancer |
| 187.1 | Malignant tumors of the foreskin                                       | Cancer |
| 187.2 | Malignant tumors of the glans penis                                    | Cancer |
| 187.3 | Malignant tumors of the body of the penis                              | Cancer |



|       |                                                                         |        |
|-------|-------------------------------------------------------------------------|--------|
| 187.4 | Malignant tumors of the penis, part not specified                       | Cancer |
| 187.5 | Malignant tumors of the epididymis                                      | Cancer |
| 187.6 | Malignant tumors of the spermatic cord                                  | Cancer |
| 187.7 | Malignant tumors of the scrotum                                         | Cancer |
| 187.8 | Malignancies of other specified sites of the male genital organs        | Cancer |
| 187.9 | Malignancies of the male genital organs, site unspecified               | Cancer |
| 188.  | Malignant bladder tumors                                                | Cancer |
| 188.0 | Malignant tumors of the bladder trine                                   | Cancer |
| 188.1 | Malignant tumors of the bladder dome                                    | Cancer |
| 188.2 | Malignant tumors of the lateral wall of the bladder                     | Cancer |
| 188.3 | Malignant tumors of the anterior wall of the bladder                    | Cancer |
| 188.4 | Malignant tumors of the posterior wall of the bladder                   | Cancer |
| 188.5 | Malignant tumors of the bladder neck                                    | Cancer |
| 188.6 | Malignant tumors of the ureteral ostium                                 | Cancer |
| 188.7 | Malignant tumors of the uracus                                          | Cancer |
| 188.8 | Malignancies from other specified bladder sites                         | Cancer |
| 188.9 | Malignant tumors of unspecified part of the bladder                     | Cancer |
| 189.  | Malignant tumors of the kidney and other and unspecified urinary        | Cancer |
| 189.0 | Malignant tumors of the kidney, except the pelvis                       | Cancer |
| 189.1 | Malignant tumors of the renal pelvis                                    | Cancer |
| 189.2 | Malignant tumors of the ureter                                          | Cancer |
| 189.3 | Malignant tumors of the urethra                                         | Cancer |
| 189.4 | Malignant tumors of the paraurethral glands                             | Cancer |
| 189.8 | Malignancies of other specified urinary organ sites                     | Cancer |
| 189.9 | Malignant tumors of the urinary organs, site not specified              | Cancer |
| 190.  | Malignant tumors of the eye                                             | Cancer |
| 190.0 | Malignant tumors of the eyeball, except conjunctiva, cornea, retina and | Cancer |
| 190.1 | Malignant tumors of the orbit                                           | Cancer |
| 190.2 | Malignant tumors of the lacrimal gland                                  | Cancer |
| 190.3 | Malignant tumors of the conjunctiva                                     | Cancer |
| 190.4 | Malignant tumors of the cornea                                          | Cancer |
| 190.5 | Malignant tumors of the retina                                          | Cancer |
| 190.6 | Malignant tumors of the choroid                                         | Cancer |
| 190.7 | Malignant tumors of the tear ducts                                      | Cancer |
| 190.8 | Malignancies from other specified eye sites                             | Cancer |
| 190.9 | Malignant tumors of the eye, part not specified                         | Cancer |
| 191.  | Malignant tumors of the brain                                           | Cancer |
| 191.0 | Malignant tumors of the brain, except lobes and ventricles              | Cancer |
| 191.1 | Malignant tumors of the frontal lobe                                    | Cancer |
| 191.2 | Malignant tumors of the temporal lobe                                   | Cancer |
| 191.3 | Malignant tumors of the parietal lobe                                   | Cancer |
| 191.4 | Malignant tumors of the occipital lobe                                  | Cancer |
| 191.5 | Malignant tumors of the ventricles                                      | Cancer |
| 191.6 | Malignant tumors of the cerebellum, SAI                                 | Cancer |
| 191.7 | Malignant tumors of the brainstem                                       | Cancer |
| 191.8 | Malignant tumors of other parts of the brain                            | Cancer |
| 191.9 | Malignant brain tumors, unspecified                                     | Cancer |
| 192.  | Malignant tumors of other and unspecified parts of the nervous system   | Cancer |
| 192.0 | Malignant tumors of the cranial nerves                                  | Cancer |
| 192.1 | Malignant tumors of the cerebral meninges                               | Cancer |
| 192.2 | Malignant tumors of the spinal cord                                     | Cancer |
| 192.3 | Malignant tumors of the spinal meninges                                 | Cancer |
| 192.8 | Malignancies of other specified sites of the nervous system             | Cancer |
| 192.9 | Malignant tumors of the nervous system, part not specified              | Cancer |
| 193.  | Malignant tumors of the thyroid gland                                   | Cancer |
| 194.  | Malignant tumors of the other endocrine glands and related structures   | Cancer |
| 194.0 | Malignant tumors of the adrenal glands                                  | Cancer |
| 194.1 | Malignant tumors of the parathyroid glands                              | Cancer |
| 194.3 | Malignant tumors of the pituitary gland and craniopharyngeal duct       | Cancer |
| 194.4 | Malignant tumors of the pineal gland                                    | Cancer |

|        |                                                                     |        |
|--------|---------------------------------------------------------------------|--------|
| 194.5  | Malignant tumors of the carotid glomus                              | Cancer |
| 194.6  | Malignant tumors of the aortic glomus and other paraganglia         | Cancer |
| 194.8  | Other malignancies of the other endocrine glands and related        | Cancer |
| 194.9  | Malignant tumors of the endocrine glands, site not specified        | Cancer |
| 195.   | Malignant tumors of other and ill-defined sites                     | Cancer |
| 195.0  | Malignant tumors of the head, face and neck                         | Cancer |
| 195.1  | Malignant tumors of the chest                                       | Cancer |
| 195.2  | Malignant tumors of the abdomen                                     | Cancer |
| 195.3  | Malignant tumors of the pelvis                                      | Cancer |
| 195.4  | Malignant tumors of the upper limb                                  | Cancer |
| 195.5  | Malignant tumors of the lower limb                                  | Cancer |
| 195.8  | Malignancies from other specified sites                             | Cancer |
| 196.   | Secondary and unspecified malignant tumors of lymph nodes           | Cancer |
| 196.0  | Secondary and unspecified malignant tumors of the head, face and    | Cancer |
| 196.1  | Secondary and unspecified malignant tumors of intrathoracic lymph   | Cancer |
| 196.2  | Secondary and unspecified malignant tumors of intraabdominal lymph  | Cancer |
| 196.3  | Secondary and unspecified malignant tumors of the lymph nodes of    | Cancer |
| 196.5  | Secondary and unspecified malignant tumors of the lymph nodes of    | Cancer |
| 196.6  | Secondary and unspecified malignant tumors of intrapelvic lymph     | Cancer |
| 196.8  | Secondary and unspecified malignant tumors of lymph nodes, multiple | Cancer |
| 196.9  | Secondary and unspecified malignant tumors of lymph nodes, site     | Cancer |
| 197.   | Secondary malignant tumors of the respiratory and digestive systems | Cancer |
| 197.0  | Secondary malignant tumors of the lung                              | Cancer |
| 197.1  | Secondary malignant tumors of the mediastinum                       | Cancer |
| 197.2  | Secondary malignant tumors of the pleura                            | Cancer |
| 197.3  | Secondary malignant tumors of other respiratory organs              | Cancer |
| 197.4  | Secondary malignant tumors of the small intestine, including the    | Cancer |
| 197.5  | Secondary malignant tumors of the colon and rectum                  | Cancer |
| 197.6  | Secondary malignant tumors of retroperitoneum and peritoneum        | Cancer |
| 197.7  | Secondary malignancies of the liver, specified as metastatic        | Cancer |
| 197.8  | Secondary malignant tumors of other digestive organs and spleen     | Cancer |
| 198.   | Secondary malignancies from other specified sites                   | Cancer |
| 198.0  | Secondary malignant tumors of the kidney                            | Cancer |
| 198.1  | Secondary malignant tumors of other urinary organs                  | Cancer |
| 198.2  | Secondary malignant skin tumors                                     | Cancer |
| 198.3  | Secondary malignant tumors of the brain and spinal cord             | Cancer |
| 198.4  | Secondary malignancies of other parts of the nervous system         | Cancer |
| 198.5  | Secondary malignant tumors of bone and bone marrow                  | Cancer |
| 198.6  | Secondary malignant tumors of the ovary                             | Cancer |
| 198.7  | Secondary malignant tumors of the adrenal gland                     | Cancer |
| 198.8  | Secondary malignancies from other specified sites                   | Cancer |
| 198.81 | Secondary malignant tumors of the breast                            | Cancer |
| 198.82 | Secondary malignant tumors of the genital organs                    | Cancer |
| 198.89 | Secondary malignancies from other specified sites                   | Cancer |
| 199.   | Malignancies without location indication                            | Cancer |
| 199.0  | Disseminated malignancies without location indication               | Cancer |
| 199.1  | Other malignancies without indication of location                   | Cancer |
| 200.   | Lymphosarcoma and reticulosarcoma                                   | Cancer |
| 200.0  | Reticulosarcoma                                                     | Cancer |
| 200.00 | Reticulosarcoma, site unspecified, solid organs or extranodal sites | Cancer |
| 200.01 | Reticulosarcoma, lymph nodes of the head and neck                   | Cancer |
| 200.02 | Reticulosarcoma, intrathoracic lymph nodes, mediastinal             | Cancer |
| 200.03 | Reticulosarcoma, intraabdominal lymph nodes                         | Cancer |
| 200.04 | Reticulosarcoma, axillary lymph nodes and upper limb                | Cancer |
| 200.05 | Reticulosarcoma, inguinal and lower limb lymph nodes                | Cancer |
| 200.06 | Reticulosarcoma, pelvic lymph nodes                                 | Cancer |
| 200.07 | Reticulosarcoma, spleen                                             | Cancer |
| 200.08 | Reticulosarcoma, lymph nodes of multiple sites                      | Cancer |
| 200.1  | Lymphosarcoma                                                       | Cancer |
| 200.10 | Lymphosarcoma, site unspecified, solid organs or extranodal sites   | Cancer |

|        |                                                                         |        |
|--------|-------------------------------------------------------------------------|--------|
| 200.11 | Lymphosarcoma, lymph nodes of the head and neck                         | Cancer |
| 200.12 | Lymphosarcoma, intrathoracic lymph nodes, mediastinal                   | Cancer |
| 200.13 | Lymphosarcoma, intraabdominal lymph nodes                               | Cancer |
| 200.14 | Lymphosarcoma, axillary lymph nodes and upper limb                      | Cancer |
| 200.15 | Lymphosarcoma, inguinal and lower limb lymph nodes                      | Cancer |
| 200.16 | Lymphosarcoma, pelvic lymph nodes                                       | Cancer |
| 200.17 | Lymphosarcoma, spleen                                                   | Cancer |
| 200.18 | Lymphosarcoma, lymph nodes of multiple sites                            | Cancer |
| 200.2  | Lymphoma or Burkitt's tumor                                             | Cancer |
| 200.20 | Lymphoma or Burkitt's tumor, site not specified, solid organs or        | Cancer |
| 200.21 | Lymphoma or Burkitt's tumor, lymph nodes of the head and neck           | Cancer |
| 200.22 | Lymphoma or Burkitt's tumor, intrathoracic lymph nodes, mediastinal     | Cancer |
| 200.23 | Lymphoma or Burkitt's tumor, intraabdominal lymph nodes                 | Cancer |
| 200.24 | Lymphoma or Burkitt's tumor, axillary lymph nodes and upper limb        | Cancer |
| 200.25 | Lymphoma or Burkitt's tumor, inguinal and lower limb lymph nodes        | Cancer |
| 200.26 | Lymphoma or Burkitt's tumor, pelvic lymph nodes                         | Cancer |
| 200.27 | Lymphoma or Burkitt's tumor, spleen                                     | Cancer |
| 200.28 | Lymphoma or Burkitt's tumor, lymph nodes of multiple sites              | Cancer |
| 200.8  | Other variants                                                          | Cancer |
| 200.80 | Other variants, site not specified, solid organs or extranodal sites    | Cancer |
| 200.81 | Other variants, lymph nodes of the head and neck                        | Cancer |
| 200.82 | Other variants, intrathoracic lymph nodes, mediastinal                  | Cancer |
| 200.83 | Other variants, intraabdominal lymph nodes                              | Cancer |
| 200.84 | Other variants, axillary lymph nodes and upper limb                     | Cancer |
| 200.85 | Other variants, inguinal and lower limb lymph nodes                     | Cancer |
| 200.86 | Other variants, pelvic lymph nodes                                      | Cancer |
| 200.87 | Other variants, spleen                                                  | Cancer |
| 200.88 | Other variants, lymph nodes of multiple sites                           | Cancer |
| 201.   | Hodgkin's disease                                                       | Cancer |
| 201.0  | Hodgkin's paraganuloma                                                  | Cancer |
| 201.00 | Hodgkin's paraganuloma, site not specified, solid organs or extranodal  | Cancer |
| 201.01 | Hodgkin's paraganuloma, lymph nodes of the head and neck                | Cancer |
| 201.02 | Hodgkin's paraganuloma, intrathoracic, mediastinal lymph nodes          | Cancer |
| 201.03 | Hodgkin's paraganuloma, intraabdominal lymph nodes                      | Cancer |
| 201.04 | Hodgkin's paraganuloma, axillary lymph nodes and upper limb             | Cancer |
| 201.05 | Hodgkin's paraganuloma, inguinal and lower limb lymph nodes             | Cancer |
| 201.06 | Hodgkin's paraganuloma, pelvic lymph nodes                              | Cancer |
| 201.07 | Hodgkin's paraganuloma, spleen                                          | Cancer |
| 201.08 | Hodgkin's paraganuloma, lymph nodes of multiple sites                   | Cancer |
| 201.1  | Hodgkin's granuloma                                                     | Cancer |
| 201.10 | Hodgkin's granuloma, site not specified, solid organs or extranodal     | Cancer |
| 201.11 | Hodgkin's granuloma, lymph nodes of the head and neck                   | Cancer |
| 201.12 | Hodgkin's granuloma, intrathoracic lymph nodes, mediastinal             | Cancer |
| 201.13 | Hodgkin's granuloma, intraabdominal lymph nodes                         | Cancer |
| 201.14 | Hodgkin's granuloma, axillary lymph nodes and upper limb                | Cancer |
| 201.15 | Hodgkin's granuloma, inguinal lymph nodes and lower limb                | Cancer |
| 201.16 | Hodgkin's granuloma, pelvic lymph nodes                                 | Cancer |
| 201.17 | Hodgkin's granuloma, spleen                                             | Cancer |
| 201.18 | Hodgkin's granuloma, lymph nodes of multiple sites                      | Cancer |
| 201.2  | Hodgkin's sarcoma                                                       | Cancer |
| 201.20 | Hodgkin's sarcoma, site not specified, solid organs or extranodal sites | Cancer |
| 201.21 | Hodgkin's sarcoma, lymph nodes of the head and neck                     | Cancer |
| 201.22 | Hodgkin's sarcoma, intrathoracic lymph nodes, mediastinal               | Cancer |
| 201.23 | Hodgkin's sarcoma, intraabdominal lymph nodes                           | Cancer |
| 201.24 | Hodgkin's sarcoma, axillary lymph nodes and upper limb                  | Cancer |
| 201.25 | Hodgkin's sarcoma, inguinal and lower limb lymph nodes                  | Cancer |
| 201.26 | Hodgkin's sarcoma, pelvic lymph nodes                                   | Cancer |
| 201.27 | Hodgkin's sarcoma, spleen                                               | Cancer |
| 201.28 | Hodgkin's sarcoma, lymph nodes of multiple sites                        | Cancer |
| 201.4  | Lymphocytic-histiocytic predominance                                    | Cancer |

|        |                                                                         |        |
|--------|-------------------------------------------------------------------------|--------|
| 201.40 | Lymphocytic-histiocytic predominance, unspecified site, solid organs or | Cancer |
| 201.41 | Lymphocytic-histiocytic predominance, lymph nodes of the head and       | Cancer |
| 201.42 | Lymphocytic-histiocytic predominance, intrathoracic, mediastinal lymph  | Cancer |
| 201.43 | Lymphocytic-histiocytic predominance, intraabdominal lymph nodes        | Cancer |
| 201.44 | Lymphocytic-histiocytic predominance, axillary lymph nodes and upper    | Cancer |
| 201.45 | Lymphocytic-histiocytic predominance, inguinal and lower limb lymph     | Cancer |
| 201.46 | Lymphocytic-histiocytic predominance, pelvic lymph nodes                | Cancer |
| 201.47 | Lymphocytic-histiocytic predominance, spleen                            | Cancer |
| 201.48 | Lymphocytic-histiocytic predominance, lymph nodes of multiple sites     | Cancer |
| 201.5  | Nodular sclerosis                                                       | Cancer |
| 201.50 | Nodular sclerosis, unspecified site, solid organs or extranodal sites   | Cancer |
| 201.51 | Nodular sclerosis, lymph nodes of the head and neck                     | Cancer |
| 201.52 | Nodular sclerosis, intrathoracic lymph nodes, mediastinal               | Cancer |
| 201.53 | Nodular sclerosis, intraabdominal lymph nodes                           | Cancer |
| 201.54 | Nodular sclerosis, axillary lymph nodes and upper limb                  | Cancer |
| 201.55 | Nodular sclerosis, inguinal and lower limb lymph nodes                  | Cancer |
| 201.56 | Nodular sclerosis, pelvic lymph nodes                                   | Cancer |
| 201.57 | Nodular sclerosis, spleen                                               | Cancer |
| 201.58 | Nodular sclerosis, lymph nodes of multiple sites                        | Cancer |
| 201.6  | Mixed cellularity                                                       | Cancer |
| 201.60 | Mixed cellularity, site not specified, solid organs or extranodal sites | Cancer |
| 201.61 | Mixed cellularity, lymph nodes of the head and neck                     | Cancer |
| 201.62 | Mixed cellularity, intrathoracic lymph nodes, mediastinal               | Cancer |
| 201.63 | Mixed cellularity, intraabdominal lymph nodes                           | Cancer |
| 201.64 | Mixed cellularity, axillary and upper limb lymph nodes                  | Cancer |
| 201.65 | Mixed cellularity, inguinal and lower limb lymph nodes                  | Cancer |
| 201.66 | Mixed cellularity, pelvic lymph nodes                                   | Cancer |
| 201.67 | Mixed cellularity, spleen                                               | Cancer |
| 201.68 | Mixed cellularity, lymph nodes of multiple sites                        | Cancer |
| 201.7  | Lymphocyte depletion                                                    | Cancer |
| 201.70 | Lymphocyte depletion, site unspecified, solid organs or extranodal      | Cancer |
| 201.71 | Lymphocyte depletion, lymph nodes of the head and neck                  | Cancer |
| 201.72 | Lymphocyte depletion, intrathoracic lymph nodes, mediastinal            | Cancer |
| 201.73 | Lymphocyte depletion, intraabdominal lymph nodes                        | Cancer |
| 201.74 | Lymphocyte depletion, axillary lymph nodes and upper limb               | Cancer |
| 201.75 | Lymphocyte depletion, inguinal lymph nodes and lower limb               | Cancer |
| 201.76 | Lymphocyte depletion, pelvic lymph nodes                                | Cancer |
| 201.77 | Lymphocyte depletion, spleen                                            | Cancer |
| 201.78 | Lymphocyte depletion, lymph nodes of multiple sites                     | Cancer |
| 201.9  | Hodgkin's disease, unspecified                                          | Cancer |
| 201.90 | Hodgkin's disease, unspecified, site unspecified, solid organs or       | Cancer |
| 201.91 | Hodgkin's disease, unspecified, lymph nodes of the head and neck        | Cancer |
| 201.92 | Hodgkin's disease, unspecified, intrathoracic lymph nodes, mediastinal  | Cancer |
| 201.93 | Hodgkin's disease, unspecified, intraabdominal lymph nodes              | Cancer |
| 201.94 | Hodgkin's disease, unspecified, axillary and upper limb lymph nodes     | Cancer |
| 201.95 | Hodgkin's disease, unspecified, inguinal and lower limb lymph nodes     | Cancer |
| 201.96 | Hodgkin's disease, unspecified, pelvic lymph nodes                      | Cancer |
| 201.97 | Hodgkin's disease, unspecified, spleen                                  | Cancer |
| 201.98 | Hodgkin's disease, unspecified, lymph nodes of multiple sites           | Cancer |
| 202.   | Other malignancies of lymphatic and histiocytic tissue                  | Cancer |
| 202.0  | Nodular lymphoma                                                        | Cancer |
| 202.00 | Nodular lymphoma, unspecified site, solid organs or extranodal sites    | Cancer |
| 202.01 | Nodular lymphoma, lymph nodes of the head and neck                      | Cancer |
| 202.02 | Nodular lymphoma, intrathoracic lymph nodes, mediastinal                | Cancer |
| 202.03 | Nodular lymphoma, intraabdominal lymph nodes                            | Cancer |
| 202.04 | Nodular lymphoma, axillary lymph nodes and upper limb                   | Cancer |
| 202.05 | Nodular lymphoma, inguinal and lower limb lymph nodes                   | Cancer |
| 202.06 | Nodular lymphoma, pelvic lymph nodes                                    | Cancer |
| 202.07 | Nodular lymphoma, spleen                                                | Cancer |
| 202.08 | Nodular lymphoma, lymph nodes of multiple sites                         | Cancer |

|        |                                                                          |        |
|--------|--------------------------------------------------------------------------|--------|
| 202.1  | Mycosis fungoides                                                        | Cancer |
| 202.10 | Mycosis fungoides, site not specified, solid organs or extranodal sites  | Cancer |
| 202.11 | Mycosis fungoides, lymph nodes of the head and neck                      | Cancer |
| 202.12 | Mycosis fungoides, intrathoracic, mediastinal lymph nodes                | Cancer |
| 202.13 | Mycosis fungoides, intraabdominal lymph nodes                            | Cancer |
| 202.14 | Mycosis fungoides, axillary lymph nodes and upper limb                   | Cancer |
| 202.15 | Mycosis fungoides, inguinal lymph nodes and lower limb                   | Cancer |
| 202.16 | Mycosis fungoides, pelvic lymph nodes                                    | Cancer |
| 202.17 | Mycosis fungoides, spleen                                                | Cancer |
| 202.18 | Mycosis fungoides, lymph nodes of multiple sites                         | Cancer |
| 202.2  | Serzary disease                                                          | Cancer |
| 202.20 | Serzary disease, site not specified, solid organs or extranodal sites    | Cancer |
| 202.21 | Serzary's disease, lymph nodes of the head and neck                      | Cancer |
| 202.22 | Serzary disease, intrathoracic lymph nodes, mediastinal                  | Cancer |
| 202.23 | Serzary's disease, intraabdominal lymph nodes                            | Cancer |
| 202.24 | Serzary's disease, axillary lymph nodes and upper limb                   | Cancer |
| 202.25 | Serzary's disease, inguinal and lower limb lymph nodes                   | Cancer |
| 202.26 | Serzary's disease, pelvic lymph nodes                                    | Cancer |
| 202.27 | Serzary disease, spleen                                                  | Cancer |
| 202.28 | Serzary disease, lymph nodes of multiple sites                           | Cancer |
| 202.3  | Malignant histiocytosis                                                  | Cancer |
| 202.30 | Malignant histiocytosis, unspecified site, solid organs or extranodal    | Cancer |
| 202.31 | Malignant histiocytosis, lymph nodes of the head and neck                | Cancer |
| 202.32 | Malignant histiocytosis, intrathoracic, mediastinal lymph nodes          | Cancer |
| 202.33 | Malignant histiocytosis, intraabdominal lymph nodes                      | Cancer |
| 202.34 | Malignant histiocytosis, axillary and upper limb lymph nodes             | Cancer |
| 202.35 | Malignant histiocytosis, inguinal and lower limb lymph nodes             | Cancer |
| 202.36 | Malignant histiocytosis, pelvic lymph nodes                              | Cancer |
| 202.37 | Malignant histiocytosis, spleen                                          | Cancer |
| 202.38 | Malignant histiocytosis, lymph nodes of multiple sites                   | Cancer |
| 202.4  | Leukemic reticuloendotheliosis                                           | Cancer |
| 202.40 | Leukemic reticuloendotheliosis, site unspecified, solid organs or        | Cancer |
| 202.41 | Leukemic reticuloendotheliosis, lymph nodes of the head and neck         | Cancer |
| 202.42 | Leukemic reticuloendotheliosis, intrathoracic lymph nodes, mediastinal   | Cancer |
| 202.43 | Leukemic reticuloendotheliosis, intraabdominal lymph nodes               | Cancer |
| 202.44 | Leukemic reticuloendotheliosis, axillary and upper limb lymph nodes      | Cancer |
| 202.45 | Leukemic reticuloendotheliosis, inguinal and lower limb lymph nodes      | Cancer |
| 202.46 | Leukemic reticuloendotheliosis, pelvic lymph nodes                       | Cancer |
| 202.47 | Leukemic reticuloendotheliosis, spleen                                   | Cancer |
| 202.48 | Leukemic reticuloendotheliosis, lymph nodes of multiple sites            | Cancer |
| 202.5  | Letterer Siwe disease                                                    | Cancer |
| 202.50 | Siwe Letterer disease, site not specified, solid organs or extranodal    | Cancer |
| 202.51 | Letterer Siwe disease, lymph nodes of the head and neck                  | Cancer |
| 202.52 | Letterer Siwe disease, intrathoracic, mediastinal lymph nodes            | Cancer |
| 202.53 | Letterer Siwe disease, intraabdominal lymph nodes                        | Cancer |
| 202.54 | Letterer Siwe's disease, axillary lymph nodes and upper limb             | Cancer |
| 202.55 | Letterer Siwe disease, inguinal and lower limb lymph nodes               | Cancer |
| 202.56 | Letterer Siwe disease, pelvic lymph nodes                                | Cancer |
| 202.57 | Letterer Siwe disease, spleen                                            | Cancer |
| 202.58 | Letterer Siwe disease, lymph nodes of multiple sites                     | Cancer |
| 202.6  | Malignant tumors of mast cells                                           | Cancer |
| 202.60 | Malignant mast cell tumors, site unspecified, solid organs or extranodal | Cancer |
| 202.61 | Malignant tumors of mast cells, lymph nodes of the head and neck         | Cancer |
| 202.62 | Malignant tumors of mast cells, intrathoracic, mediastinal lymph nodes   | Cancer |
| 202.63 | Malignant tumors of mast cells, intraabdominal lymph nodes               | Cancer |
| 202.64 | Malignant tumors of mast cells, axillary lymph nodes and upper limb      | Cancer |
| 202.65 | Malignant tumors of mast cells, inguinal lymph nodes and lower limb      | Cancer |
| 202.66 | Malignant tumors of mast cells, pelvic lymph nodes                       | Cancer |
| 202.67 | Malignant tumors of mast cells, spleen                                   | Cancer |
| 202.68 | Malignant tumors of mast cells, lymph nodes of multiple sites            | Cancer |

|        |                                                                       |        |
|--------|-----------------------------------------------------------------------|--------|
| 202.8  | Other lymphomas                                                       | Cancer |
| 202.80 | Other lymphomas, site not specified, solid organs or extranodal sites | Cancer |
| 202.81 | Other lymphomas, lymph nodes of the head and neck                     | Cancer |
| 202.82 | Other lymphomas, intrathoracic lymph nodes, mediastinal               | Cancer |
| 202.83 | Other lymphomas, intraabdominal lymph nodes                           | Cancer |
| 202.84 | Other lymphomas, axillary lymph nodes and upper limb                  | Cancer |
| 202.85 | Other lymphomas, inguinal lymph nodes and lower limb                  | Cancer |
| 202.86 | Other lymphomas, pelvic lymph nodes                                   | Cancer |
| 202.87 | Other lymphomas, spleen                                               | Cancer |
| 202.88 | Other lymphomas, lymph nodes of multiple sites                        | Cancer |
| 202.9  | Other unspecified malignancies of lymphoid and histiocytic tissue     | Cancer |
| 202.90 | Other unspecified malignancies of lymphoid and histiocytic tissue,    | Cancer |
| 202.91 | Other unspecified malignancies of lymphoid and histiocytic tissue,    | Cancer |
| 202.92 | Other unspecified malignancies of lymphoid and histiocytic tissue,    | Cancer |
| 202.93 | Other unspecified malignancies of lymphoid and histiocytic tissue,    | Cancer |
| 202.94 | Other unspecified malignancies of lymphoid and histiocytic tissue,    | Cancer |
| 202.95 | Other unspecified malignancies of lymphoid and histiocytic tissue,    | Cancer |
| 202.96 | Other unspecified malignancies of lymphoid and histiocytic tissue,    | Cancer |
| 202.97 | Other unspecified malignancies of lymphoid and histiocytic tissue,    | Cancer |
| 202.98 | Other unspecified malignancies of lymphoid and histiocytic tissue,    | Cancer |
| 203.   | Multiple myeloma and immunoproliferative malignancies                 | Cancer |
| 203.0  | Myeloma                                                               | Cancer |
| 203.00 | Multiple myeloma, no mention of remission                             | Cancer |
| 203.01 | Multiple myeloma, in remission                                        | Cancer |
| 203.1  | Plasma cell leukemia                                                  | Cancer |
| 203.10 | Plasma cell leukemia, without mention of remission                    | Cancer |
| 203.11 | Plasma cell leukemia, in remission                                    | Cancer |
| 203.8  | Other immunoproliferative malignancies                                | Cancer |
| 203.80 | Other immunoproliferative neoplasms, without mention of remission     | Cancer |
| 203.81 | Other immunoproliferative neoplasms, in remission                     | Cancer |
| 204.   | Lymphoid leukemia                                                     | Cancer |
| 204.0  | Lymphoid leukemia, acute                                              | Cancer |
| 204.00 | Lymphoid leukemia, acute, without mention of remission                | Cancer |
| 204.01 | Lymphoid leukemia, acute, in remission                                | Cancer |
| 204.1  | Lymphoid leukemia, chronic                                            | Cancer |
| 204.10 | Lymphoid leukemia, chronic, without mention of remission              | Cancer |
| 204.11 | Lymphoid leukemia, chronic, in remission                              | Cancer |
| 204.2  | Lymphoid leukemia, subacute                                           | Cancer |
| 204.20 | Lymphoid leukemia, subacute, without mention of remission             | Cancer |
| 204.21 | Lymphoid leukemia, subacute, in remission                             | Cancer |
| 204.8  | Other lymphatic leukemias                                             | Cancer |
| 204.80 | Other lymphatic leukemias, without mention of remission               | Cancer |
| 204.81 | Other lymphatic leukemias, in remission                               | Cancer |
| 204.9  | Lymphoid leukemia, unspecified                                        | Cancer |
| 204.90 | Lymphoid leukemia, unspecified, without mention of remission          | Cancer |
| 204.91 | Lymphoid leukemia, unspecified, in remission                          | Cancer |
| 205.   | Myeloid leukemia                                                      | Cancer |
| 205.0  | Myeloid leukemia, acute                                               | Cancer |
| 205.00 | Myeloid leukemia, acute, without mention of remission                 | Cancer |
| 205.01 | Myeloid leukemia, acute, in remission                                 | Cancer |
| 205.1  | Myeloid leukemia, chronic                                             | Cancer |
| 205.10 | Myeloid leukemia, chronic, without mention of remission               | Cancer |
| 205.11 | Myeloid leukemia, chronic, in remission                               | Cancer |
| 205.2  | Myeloid leukemia, subacute                                            | Cancer |
| 205.20 | Myeloid leukemia, subacute, without mention of remission              | Cancer |
| 205.21 | Myeloid leukemia, subacute, in remission                              | Cancer |
| 205.3  | Myeloid sarcoma                                                       | Cancer |
| 205.30 | Myeloid sarcoma, without mention of remission                         | Cancer |
| 205.31 | Myeloid sarcoma, in remission                                         | Cancer |
| 205.8  | Other myeloid leukemias                                               | Cancer |

|        |                                                                       |        |
|--------|-----------------------------------------------------------------------|--------|
| 205.80 | Other myeloid leukemias, without mention of remission                 | Cancer |
| 205.81 | Other myeloid leukemias, in remission                                 | Cancer |
| 205.9  | Myeloid leukemia, unspecified                                         | Cancer |
| 205.90 | Myeloid leukemia, unspecified, without mention of remission           | Cancer |
| 205.91 | Myeloid leukemia, unspecified, in remission                           | Cancer |
| 206.   | Monocytic leukemia                                                    | Cancer |
| 206.0  | Monocytic leukemia, acute                                             | Cancer |
| 206.00 | Monocytic leukemia, acute, without mention of remission               | Cancer |
| 206.01 | Monocytic leukemia, acute, in remission                               | Cancer |
| 206.1  | Monocytic leukemia, chronic                                           | Cancer |
| 206.10 | Monocytic leukemia, chronic, without mention of remission             | Cancer |
| 206.11 | Monocytic leukemia, chronic, in remission                             | Cancer |
| 206.2  | Monocytic leukemia, subacute                                          | Cancer |
| 206.20 | Monocytic leukemia, subacute, without mention of remission            | Cancer |
| 206.21 | Monocytic leukemia, subacute, in remission                            | Cancer |
| 206.8  | Other monocytic leukemias                                             | Cancer |
| 206.80 | Other monocytic leukemias, without mention of remission               | Cancer |
| 206.81 | Other monocytic leukemias, in remission                               | Cancer |
| 206.9  | Monocytic leukemia, unspecified                                       | Cancer |
| 206.90 | Monocytic leukemia, unspecified, without mention of remission         | Cancer |
| 206.91 | Monocytic leukemia, unspecified, in remission                         | Cancer |
| 207.   | Other specific leukemias                                              | Cancer |
| 207.0  | Acute erythremia and erythroleukemia                                  | Cancer |
| 207.00 | Acute erythremia and erythroleukemia, without mention of remission    | Cancer |
| 207.01 | Acute erythremia and erythroleukemia, in remission                    | Cancer |
| 207.1  | Chronic erythremia                                                    | Cancer |
| 207.10 | Chronic erythremia, without mention of remission                      | Cancer |
| 207.11 | Chronic erythremia, in remission                                      | Cancer |
| 207.2  | Megakaryocytic leukemia                                               | Cancer |
| 207.20 | Megakaryocytic leukemia, without mention of remission                 | Cancer |
| 207.21 | Megakaryocytic leukemia, in remission                                 | Cancer |
| 207.8  | Other specific leukemias                                              | Cancer |
| 207.80 | Other specific leukemias, without mention of remission                | Cancer |
| 207.81 | Other specific leukemias, in remission                                | Cancer |
| 208.   | Unspecified cell type leukemia                                        | Cancer |
| 208.0  | Unspecified, acute cell type leukemia                                 | Cancer |
| 208.00 | Unspecified cell type leukemia, acute, with no mention of remission   | Cancer |
| 208.01 | Unspecified cell type leukemia, acute, in remission                   | Cancer |
| 208.1  | Unspecified, chronic cell type leukemia                               | Cancer |
| 208.10 | Unspecified, chronic cell type leukemia with no mention of remission  | Cancer |
| 208.11 | Unspecified cell type leukemia, chronic, in remission                 | Cancer |
| 208.2  | Unspecified, subacute cell leukemia                                   | Cancer |
| 208.20 | Unspecified, subacute cell type leukemia with no mention of remission | Cancer |
| 208.21 | Unspecified cell type leukemia, subacute, in remission                | Cancer |
| 208.8  | Other acute cell type leukaemias not specified                        | Cancer |
| 208.80 | Other acute cell type leukaemias not specified, without mention of    | Cancer |
| 208.81 | Other acute leukemias of unspecified cell type, acute, in remission   | Cancer |
| 208.9  | Unspecified leukemia                                                  | Cancer |
| 208.90 | Leukemia not specified, without mention of remission                  | Cancer |
| 208.91 | Unspecified leukemia, in remission                                    | Cancer |
| 230.   | In situ carcinomas of the digestive organs                            | Cancer |
| 230.0  | In situ carcinomas of the lips, oral cavity and pharynx               | Cancer |
| 230.1  | In situ carcinomas of the esophagus                                   | Cancer |
| 230.2  | In situ carcinomas of the stomach                                     | Cancer |
| 230.3  | In situ carcinomas of the colon                                       | Cancer |
| 230.4  | Carcinomas in situ of the rectum                                      | Cancer |
| 230.5  | Carcinomas in situ of the canal                                       | Cancer |
| 230.6  | In situ carcinomas of the anus, unspecified                           | Cancer |
| 230.7  | In situ carcinomas of other and unspecified sites of the intestine    | Cancer |
| 230.8  | In situ carcinomas of liver and biliary tract                         | Cancer |

|        |                                                                           |        |
|--------|---------------------------------------------------------------------------|--------|
| 230.9  | In situ carcinomas of other and unspecified digestive organs              | Cancer |
| 231.   | In situ carcinomas of the respiratory system                              | Cancer |
| 231.0  | In situ carcinomas of the larynx                                          | Cancer |
| 231.1  | In situ carcinomas of the trachea                                         | Cancer |
| 231.2  | In situ carcinomas of bronchi and lungs                                   | Cancer |
| 231.8  | In situ carcinomas of other specified sites of the respiratory system     | Cancer |
| 231.9  | In situ carcinomas of the respiratory system, site not specified          | Cancer |
| 232.   | Carcinomas in situ of the skin                                            | Cancer |
| 232.0  | Carcinomas in situ of the skin of the lips                                | Cancer |
| 232.1  | Carcinomas in situ of the eyelid, including the eyelid angle              | Cancer |
| 232.2  | In situ carcinomas of ear and external ear canal                          | Cancer |
| 232.3  | In situ carcinomas of the skin of other and unspecified parts of the face | Cancer |
| 232.4  | In situ carcinomas of scalp and skin of the neck                          | Cancer |
| 232.5  | Carcinomas in situ of skin of the trunk, except the scrotum               | Cancer |
| 232.6  | Carcinomas in situ of the skin of the upper limb, including the shoulder  | Cancer |
| 232.7  | Carcinomas in situ of the skin of the lower limb, including the hip       | Cancer |
| 232.8  | In situ carcinomas of other specified skin sites                          | Cancer |
| 232.9  | In situ skin carcinomas, site unspecified                                 | Cancer |
| 233.   | In situ carcinomas of the breast and urogenital apparatus                 | Cancer |
| 233.0  | In situ breast carcinomas                                                 | Cancer |
| 233.1  | In situ carcinomas of the uterine cervix                                  | Cancer |
| 233.2  | In situ carcinomas of other and unspecified parts of the uterus           | Cancer |
| 233.3  | In situ carcinomas of other and unspecified female genital organs         | Cancer |
| 233.4  | In situ carcinomas of the prostate                                        | Cancer |
| 233.5  | Carcinomas in situ of the penis                                           | Cancer |
| 233.6  | In situ carcinomas of other and unspecified male genital organs           | Cancer |
| 233.7  | Carcinomas in situ of the bladder                                         | Cancer |
| 233.9  | In situ carcinomas of other and unspecified urinary organs                | Cancer |
| 234.   | In situ carcinomas of other and unspecified sites                         | Cancer |
| 234.0  | Carcinomas in situ of the eye                                             | Cancer |
| 234.8  | In situ carcinomas of other specified sites                               | Cancer |
| 234.9  | Carcinomas in situ, site not specified                                    | Cancer |
| 235.   | Tumors of uncertain behavior of the digestive and respiratory systems     | Cancer |
| 235.0  | Tumors of uncertain behavior of the major salivary glands                 | Cancer |
| 235.1  | Tumors of uncertain behavior of the lips, oral cavity and pharynx         | Cancer |
| 235.2  | Tumors of uncertain behavior of the stomach, intestines and rectum        | Cancer |
| 235.3  | Tumors of uncertain behavior of liver and biliary tract                   | Cancer |
| 235.4  | Tumors of uncertain behavior of retroperitoneum and peritoneum            | Cancer |
| 235.5  | Tumors of uncertain behavior of other and unspecified digestive           | Cancer |
| 235.6  | Tumors of uncertain behavior of the larynx                                | Cancer |
| 235.7  | Tumors of uncertain behavior of trachea, bronchi and lungs                | Cancer |
| 235.8  | Tumors of uncertain behavior of pleura, thymus and mediastinum            | Cancer |
| 235.9  | Tumors of uncertain behavior of other and unspecified respiratory         | Cancer |
| 236.   | Tumors of uncertain behavior of the urogenital organs                     | Cancer |
| 236.0  | Tumors of uncertain behavior of the uterus                                | Cancer |
| 236.1  | Tumors of uncertain placental behavior                                    | Cancer |
| 236.2  | Tumors of uncertain ovarian behavior                                      | Cancer |
| 236.3  | Tumors of uncertain behavior of other and unspecified female genital      | Cancer |
| 236.4  | Tumors of uncertain testicular behavior                                   | Cancer |
| 236.5  | Tumors of uncertain behavior of the prostate                              | Cancer |
| 236.6  | Tumors of uncertain behavior of other and unspecified male genital        | Cancer |
| 236.7  | Tumors of uncertain bladder behavior                                      | Cancer |
| 236.9  | Tumors of uncertain behavior of other and unspecified urinary organs      | Cancer |
| 236.90 | Tumors of uncertain behavior of the urinary organs, unspecified           | Cancer |
| 236.91 | Tumors of uncertain behavior of kidney and ureter                         | Cancer |
| 236.99 | Other tumors of uncertain behavior of the urogenital organs               | Cancer |
| 237.   | Tumors of uncertain behavior of the endocrine glands and nervous          | Cancer |
| 237.0  | Tumors of uncertain pituitary and craniopharyngeal duct behavior          | Cancer |
| 237.1  | Tumors of uncertain behavior of the pineal gland                          | Cancer |
| 237.2  | Tumors of uncertain behavior of the adrenal glands                        | Cancer |



|        |                                                                      |        |
|--------|----------------------------------------------------------------------|--------|
| 237.3  | Tumors of uncertain behavior of paraganglia                          | Cancer |
| 237.4  | Tumors of uncertain behavior of other and unspecified endocrine      | Cancer |
| 237.5  | Tumors of uncertain behavior of the brain and spinal cord            | Cancer |
| 237.6  | Tumors of uncertain behavior of the meninges                         | Cancer |
| 237.7  | Neurofibromatosis                                                    | Cancer |
| 237.70 | Neurofibromatosis, unspecified                                       | Cancer |
| 237.71 | Neurofibromatosis type I [von Recklinghausen disease]                | Cancer |
| 237.72 | Neurofibromatosis type II [acoustic neurofibromatosis]               | Cancer |
| 237.9  | Tumors of uncertain behavior of other and unspecified parts of the   | Cancer |
| 238.   | Tumors of uncertain behavior of other and unspecified tissues and    | Cancer |
| 238.0  | Tumors of uncertain behavior of bone and articular cartilage         | Cancer |
| 238.1  | Tumors of uncertain behavior of connective tissue and other soft     | Cancer |
| 238.2  | Tumors of uncertain skin behavior                                    | Cancer |
| 238.3  | Tumors of uncertain breast behavior                                  | Cancer |
| 238.4  | Tumors of uncertain behavior of polycythemia vera                    | Cancer |
| 238.5  | Tumors of uncertain behavior of histiocytes and mast cells           | Cancer |
| 238.6  | Tumors of uncertain plasma cell behavior                             | Cancer |
| 238.7  | Tumors of uncertain behavior of other lymphatic and hematopoietic    | Cancer |
| 238.71 | Essential thrombocythemia                                            | Cancer |
| 238.72 | Myelodysplastic syndrome with low-grade lesions                      | Cancer |
| 238.73 | Myelodysplastic syndrome with high-grade lesions                     | Cancer |
| 238.74 | Myelodysplastic syndrome with deletion                               | Cancer |
| 238.75 | Myelodysplastic syndrome, unspecified                                | Cancer |
| 238.76 | Myelofibrosis with myeloid metaplasia                                | Cancer |
| 238.79 | Other lymphatic and hematopoietic tissues                            | Cancer |
| 238.8  | Tumors of uncertain behavior from other specified sites              | Cancer |
| 238.9  | Tumors of uncertain behavior, site not specified                     | Cancer |
| 239.   | Tumors of unspecified nature                                         | Cancer |
| 239.0  | Tumors of unspecified nature of the digestive system                 | Cancer |
| 239.1  | Tumors of an unspecified nature of the respiratory system            | Cancer |
| 239.2  | Tumors of unspecified nature of bone, soft tissue and skin           | Cancer |
| 239.3  | Tumors of unspecified nature of the breast                           | Cancer |
| 239.4  | Tumors of unspecified nature of the bladder                          | Cancer |
| 239.5  | Tumors of an unspecified nature of other urogenital organs           | Cancer |
| 239.6  | Tumors of unspecified nature of the brain                            | Cancer |
| 239.7  | Tumors of unspecified nature of the endocrine glands and other parts | Cancer |
| 239.8  | Tumors of an unspecified nature from other specified sites           | Cancer |
| 239.9  | Tumors of unspecified nature, site not specified                     | Cancer |

---
